# Supplementary material for: Effectiveness and safety of cladribine in MS: Real-world experience from two tertiary centres
Source: PubMed Central journal article supplement — Mult Scler. 2021 May 12;28(2):257–68. doi: 10.1177/13524585211012227 (PMC8795224; doi:10.1177/13524585211012227), 2021-05-12
Supplement: sj-pdf-1-msj-10.1177_13524585211012227.pdf [file sj-pdf-1-msj-10.1177_13524585211012227.pdf]

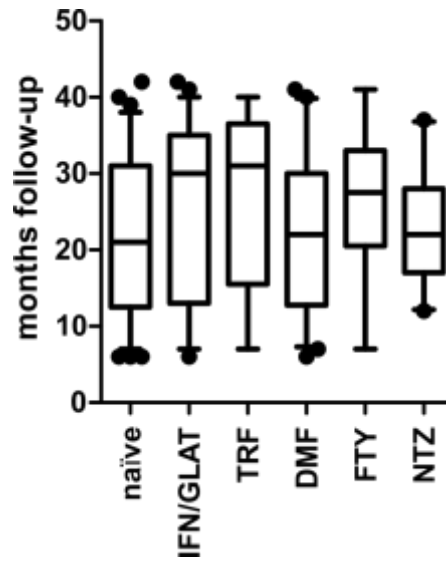

**Figure S1:** Follow-up duration following cladribine induction among different treatment subgroups. Data are shown Median $\pm$ IQR; whiskers indicate 5% to 95%. IFN/GLAT: beta-interferon/glatiramer acetate. DMF: dimethyl fumarate; FTY: fingolimod; NTZ: natalizumab.

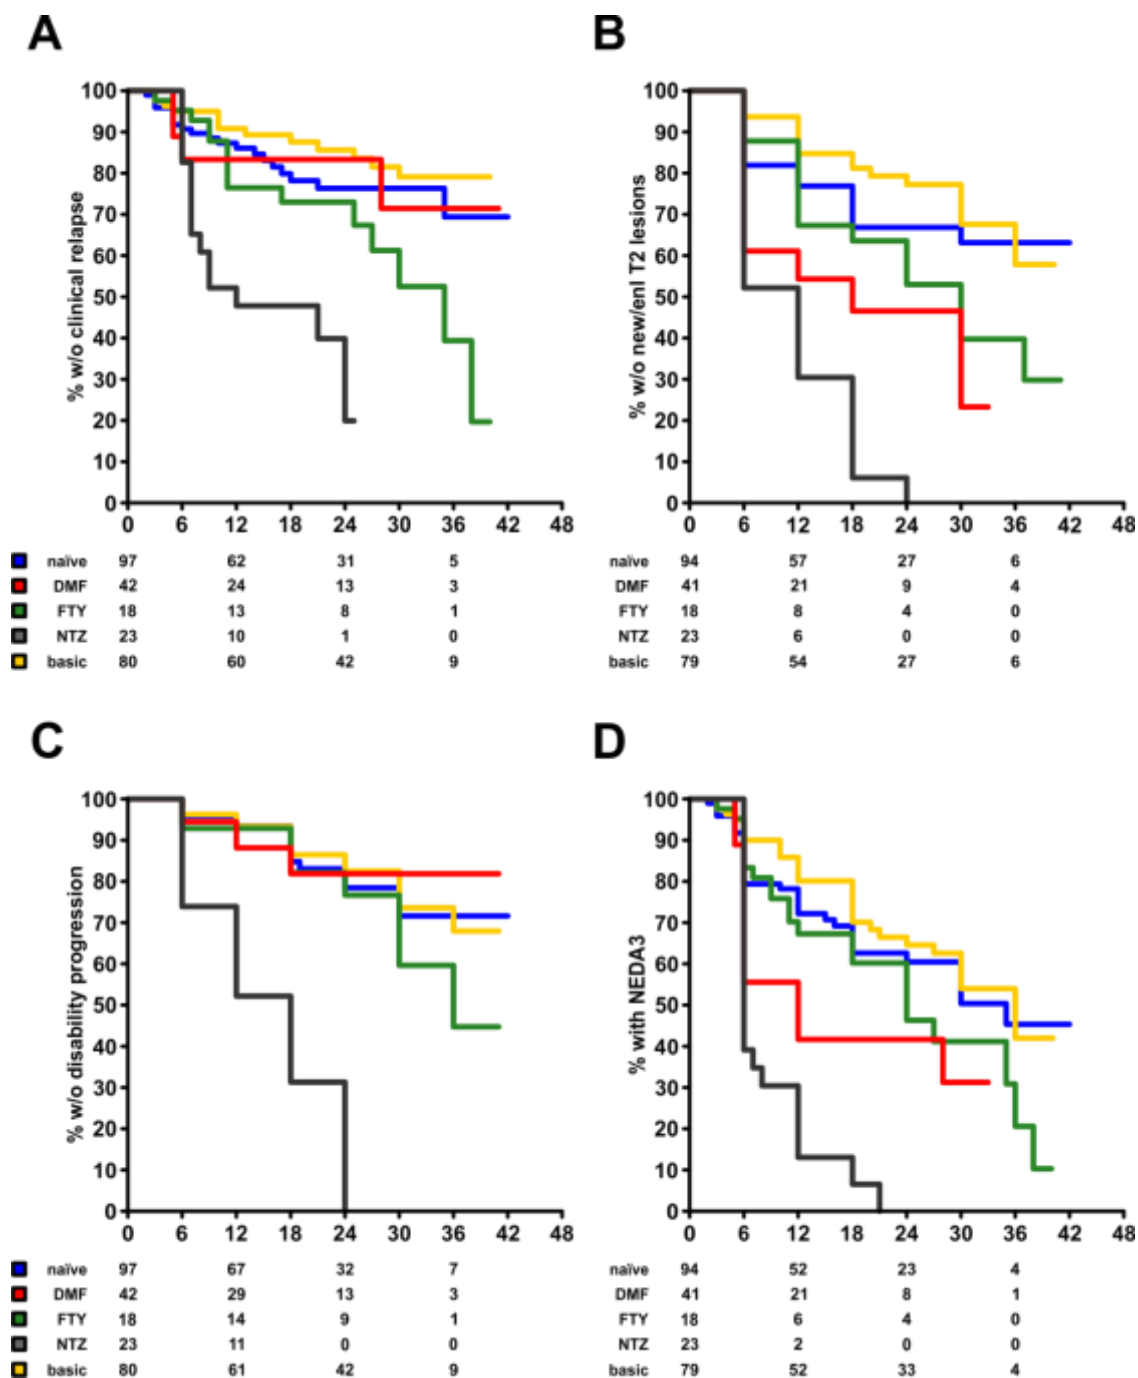

**Figure S2:** Efficacy outcomes of our cohort stratified according to the last previous DMT using the Kaplan-Meier method. Numbers at risk are displayed below the respective graphs. **A:** Proportion of patients without a clinical relapse over time. **B:** Proportion of patients without new or enlarging T2-hyperintense MRI lesions. DMF: dimethyl fumarate; FTY: fingolimod; NTZ: natalizumab. NEDA3: no evidence of disease activity-3.
